# Supplementary material for: ‘NOPAIN-ROP’ trial: Intravenous fentanyl and intravenous ketamine for pain relief during laser photocoagulation for retinopathy of prematurity (ROP) in preterm infants: A randomised trial
Source: HighWire-hosted journal article supplement (doi:10.1136/bmjopen-2020-046235), 2021-09-01

| <b>Table I: The Premature Infant Pain Profile: Revised (PIPP-R)</b>                                                                                                                                                                                                                                                                                                                                                                                                                                                                                                                                                                                                                                                                                                                                                                                                                                                                                                                        |                  |                 |                   |                                  |                        |
|--------------------------------------------------------------------------------------------------------------------------------------------------------------------------------------------------------------------------------------------------------------------------------------------------------------------------------------------------------------------------------------------------------------------------------------------------------------------------------------------------------------------------------------------------------------------------------------------------------------------------------------------------------------------------------------------------------------------------------------------------------------------------------------------------------------------------------------------------------------------------------------------------------------------------------------------------------------------------------------------|------------------|-----------------|-------------------|----------------------------------|------------------------|
| Infant indicator                                                                                                                                                                                                                                                                                                                                                                                                                                                                                                                                                                                                                                                                                                                                                                                                                                                                                                                                                                           |                  |                 |                   |                                  | Infant indicator score |
|                                                                                                                                                                                                                                                                                                                                                                                                                                                                                                                                                                                                                                                                                                                                                                                                                                                                                                                                                                                            | 0                | +1              | +2                | +3                               |                        |
| Change in heart rate(bpm)<br>Baseline: .....                                                                                                                                                                                                                                                                                                                                                                                                                                                                                                                                                                                                                                                                                                                                                                                                                                                                                                                                               | 0 - 4            | 5 - 14          | 15 - 24           | >24                              |                        |
| Decrease in oxygen saturation (%)<br>Baseline: .....                                                                                                                                                                                                                                                                                                                                                                                                                                                                                                                                                                                                                                                                                                                                                                                                                                                                                                                                       | 0 - 2            | 3 - 5           | 6 - 8             | >8 or increase in O <sub>2</sub> |                        |
| Brow bulge(sec)                                                                                                                                                                                                                                                                                                                                                                                                                                                                                                                                                                                                                                                                                                                                                                                                                                                                                                                                                                            | None (<3)        | Minimal (3-10)  | Moderate (11-20)  | Maximal (>20)                    |                        |
| Eye squeeze(sec)                                                                                                                                                                                                                                                                                                                                                                                                                                                                                                                                                                                                                                                                                                                                                                                                                                                                                                                                                                           | None (<3)        | Minimal (3-10)  | Moderate (11-20)  | Maximal (>20)                    |                        |
| Naso-labial furrow(sec)                                                                                                                                                                                                                                                                                                                                                                                                                                                                                                                                                                                                                                                                                                                                                                                                                                                                                                                                                                    | None (<3)        | Minimal (3-10)  | Moderate (11-20)  | Maximal (>20)                    |                        |
| # Sub-total score                                                                                                                                                                                                                                                                                                                                                                                                                                                                                                                                                                                                                                                                                                                                                                                                                                                                                                                                                                          |                  |                 |                   |                                  |                        |
| Gestational age (Wks+days)                                                                                                                                                                                                                                                                                                                                                                                                                                                                                                                                                                                                                                                                                                                                                                                                                                                                                                                                                                 | >36 wks          | 32 – 35 wks, 6d | 28 - 31 wks, 6d   | < 28 wks                         |                        |
| Baseline behavioural state                                                                                                                                                                                                                                                                                                                                                                                                                                                                                                                                                                                                                                                                                                                                                                                                                                                                                                                                                                 | Active and awake | Quiet and awake | Active and asleep | Quiet and asleep                 |                        |
| ## Total score                                                                                                                                                                                                                                                                                                                                                                                                                                                                                                                                                                                                                                                                                                                                                                                                                                                                                                                                                                             |                  |                 |                   |                                  |                        |
| # Subtotal for physiological and facial indicators. If subtotal score>0, add GA and BS indicator scores<br>## Total score: Subtotal score + GA score + BS score<br>Scoring instructions<br><br><b>Step 1:</b> Observe infant for <b>15 seconds at rest</b> and assess vital sign indicators<br>[highest heart rate (HR) and lowest O <sub>2</sub> saturation(O <sub>2</sub> SAT) and behavioural state<br><br><b>Step 2:</b> Observe infant for <b>30 seconds after procedure</b> and assess <b>change</b> in vital sign indicators<br>(maximal HR, lowest O <sub>2</sub> SAT and duration of facial actions observed)<br><br># If infant requires an increase in oxygen at any point before or during procedure, they receive a score of 3 for the O <sub>2</sub> SAT indicator<br><br><b>Step 3:</b> Score for corrected gestational age (GA) and behavioural state (BS) if the subtotal score>0<br><br><b>Step 4:</b> Calculate total score by adding <b>Sub-total score + BS score</b> |                  |                 |                   |                                  |                        |

**Table II: Cardiorespiratory stability scoring system**

| Score    | Designation             | Criteria                                                                                                                                                                                                           |
|----------|-------------------------|--------------------------------------------------------------------------------------------------------------------------------------------------------------------------------------------------------------------|
| <b>0</b> | Improved from baseline  | Decreased oxygen requirement (>20% relative change in FiO <sub>2</sub> )                                                                                                                                           |
| <b>1</b> | No change from baseline |                                                                                                                                                                                                                    |
| <b>2</b> | Mild instability        | Increased oxygen requirement (20%-50%) relative change in FiO <sub>2</sub> ), more apnea' and/or bradycardias responding to gentle stimulation (100% increase or 5 if none before)                                 |
| <b>3</b> | Marked instability      | Increased oxygen requirement (>50% relative change in FiO <sub>2</sub> ), more apnoea's and/or bradycardias responding to vigorous stimulation (100% increase or 5 if none before), higher ventilation requirement |
| <b>4</b> | Life threatening event  | Requiring emergency resuscitation (for example, intubation, suction/bag and mask oxygen, cardiac massage)                                                                                                          |

**Table III: Method adopted for assigning PIPP-R scores**

|                                                                                                                                                                                                  |                                                                                                                                                                                                                                          |
|--------------------------------------------------------------------------------------------------------------------------------------------------------------------------------------------------|------------------------------------------------------------------------------------------------------------------------------------------------------------------------------------------------------------------------------------------|
| <b>Step 1</b>                                                                                                                                                                                    | <b><i>Creation of standard videos</i></b><br><br>Standard videos for each score (0-3) of the behavioural and physiological indicators of PIPP-R score were made by the primary investigator which were used as the ‘reference’.          |
| <b>Step 2</b>                                                                                                                                                                                    | <b><i>Analysis of study video recordings</i></b><br><br>Two independent assessors <sup>1</sup> blinded to the group allocation then analyzed all the recorded videos by referring to the ‘reference’ videos.                             |
| <b>Step 3</b>                                                                                                                                                                                    | <b><i>Assigning final score</i></b><br><br>If the scores given by two were the same, that score was recorded as the final score. However, if it was different, the two assessors reviewed the videos together to reach a consensus score |
| <sup>1</sup> Outcome assessment team included senior resident (SR) pediatrics with at least three year experience in pediatrics and having prior experience and competency in managing neonates. |                                                                                                                                                                                                                                          |

**Table IV: Baseline characteristics – revised regimen\***

| Characteristic                                                                                                                                                                                                                                                                                                                                     | Fentanyl group<br>(N=13) | Ketamine group<br>(N=14) |
|----------------------------------------------------------------------------------------------------------------------------------------------------------------------------------------------------------------------------------------------------------------------------------------------------------------------------------------------------|--------------------------|--------------------------|
| Gestational age at birth (wk) <sup>#</sup>                                                                                                                                                                                                                                                                                                         | 30.3 ± 1.3               | 30.5 ± 2.4               |
| PMA at randomisation (wk) <sup>#</sup>                                                                                                                                                                                                                                                                                                             | 38.4 ± 3.8               | 40.6 ± 3.8               |
| Birth weight (g) <sup>#</sup>                                                                                                                                                                                                                                                                                                                      | 1281.6 ± 267             | 1301.0 ± 338             |
| Weight at randomisation (g) <sup>#</sup>                                                                                                                                                                                                                                                                                                           | 2061.7 ± 594             | 2505.2 ± 846             |
| Male gender                                                                                                                                                                                                                                                                                                                                        | 9 (69.2)                 | 7 (50)                   |
| Antenatal steroid <sup>†</sup>                                                                                                                                                                                                                                                                                                                     |                          |                          |
| Complete                                                                                                                                                                                                                                                                                                                                           | 0                        | 0                        |
| Incomplete                                                                                                                                                                                                                                                                                                                                         | 3 (23.1)                 | 1 (7.1)                  |
| None                                                                                                                                                                                                                                                                                                                                               | 8 (61.5)                 | 11 (78.6)                |
| Not known                                                                                                                                                                                                                                                                                                                                          | 2 (15.4)                 | 2 (14.2)                 |
| Cesarean delivery                                                                                                                                                                                                                                                                                                                                  | 3 (23.0)                 | 4 (28.5)                 |
| Morbidities during neonatal period                                                                                                                                                                                                                                                                                                                 |                          |                          |
| RDS                                                                                                                                                                                                                                                                                                                                                | 7 (53.8)                 | 8 (57.1)                 |
| Delayed adaptation                                                                                                                                                                                                                                                                                                                                 | 2 (15.3)                 | 3 (21.4)                 |
| Pneumonia                                                                                                                                                                                                                                                                                                                                          | 1 (7.7)                  | 3 (21.4)                 |
| AOP                                                                                                                                                                                                                                                                                                                                                | 1 (7.7)                  | 2 (14.2)                 |
| Any sepsis                                                                                                                                                                                                                                                                                                                                         | 12 (92.3)                | 13 (92.8)                |
| Hypotension requiring inotropes                                                                                                                                                                                                                                                                                                                    | 1 (7.7)                  | 2 (14.2)                 |
| Any blood product transfusion                                                                                                                                                                                                                                                                                                                      | 5 (38.4)                 | 6 (42.8)                 |
| Stage of ROP <sup>‡</sup>                                                                                                                                                                                                                                                                                                                          |                          |                          |
| APROP                                                                                                                                                                                                                                                                                                                                              | 5 (38.4)                 | 4 (28.5)                 |
| Stage 2 ± plus                                                                                                                                                                                                                                                                                                                                     | 3 (23.0)                 | 1 (7.1)                  |
| Stage 3 ± plus                                                                                                                                                                                                                                                                                                                                     | 3 (23.0)                 | 6 (42.8)                 |
| Stage 4 ± plus                                                                                                                                                                                                                                                                                                                                     | 1 (7.7)                  | 2 (14.2)                 |
| Stage 5 ± plus                                                                                                                                                                                                                                                                                                                                     | 1 (7.7)                  | 1 (7.1)                  |
| Eye lasered                                                                                                                                                                                                                                                                                                                                        |                          |                          |
| Both                                                                                                                                                                                                                                                                                                                                               | 12 (92.3)                | 12 (85.7)                |
| Right                                                                                                                                                                                                                                                                                                                                              | 0                        | 1 (7.1)                  |
| Left                                                                                                                                                                                                                                                                                                                                               | 1 (7.7)                  | 1 (7.1)                  |
| Duration of procedure (min)                                                                                                                                                                                                                                                                                                                        | 48.14<br>(35-75)         | 35.5<br>(32-45.2)        |
| <p>*Data depicted as n (%)</p> <p>#- Indicates data as mean ± SD</p> <p>†- Only in infants with available data</p> <p>‡- Worst stage of ROP was taken in cases where both eyes affected</p> <p>PMA: post menstrual age, RDS: respiratory distress syndrome, AOP: apnoea of prematurity, APROP: aggressive posterior retinopathy of prematurity</p> |                          |                          |

**Table V: Proportion of infants with adequate analgesia with respect to duration of procedure**

| <b>Duration of procedure</b> | <b>Fentanyl Initial dose</b> | <b>Ketamine Initial dose</b> | <b>Fentanyl Revised dose</b> | <b>Ketamine Revised dose</b> |
|------------------------------|------------------------------|------------------------------|------------------------------|------------------------------|
| <45 min                      | 3/9 (33.3%)                  | 0/11 (0%)                    | 0/5 (0%)                     | 0/10 (0%)                    |
| 45-60 min                    | 2/8 (25%)                    | 1/10 (10%)                   | 2/2 (100%)                   | 0/2 (0%)                     |
| >60 min                      | 3/32 (9.4%)                  | 1/23 (4.3%)                  | 1/6 (16.7%)                  | 1/2 (50%)                    |

*Data represented as n/N (%)*

**Figure 1: PIPP-R score at regular intervals between the two groups (Initial Phase)**

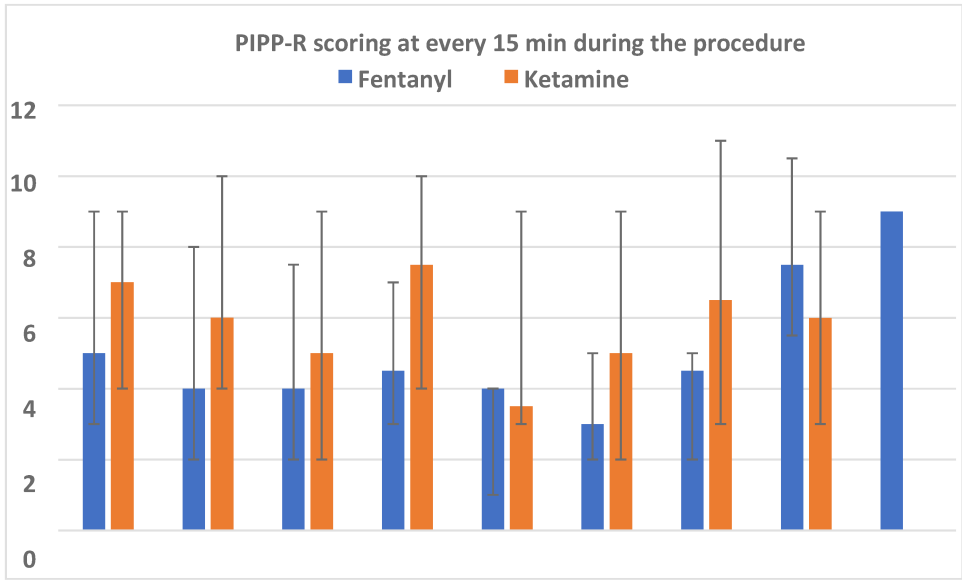

**Figure 2: PIPP-R score every 15 minutes between the two groups (Revised regimen)**

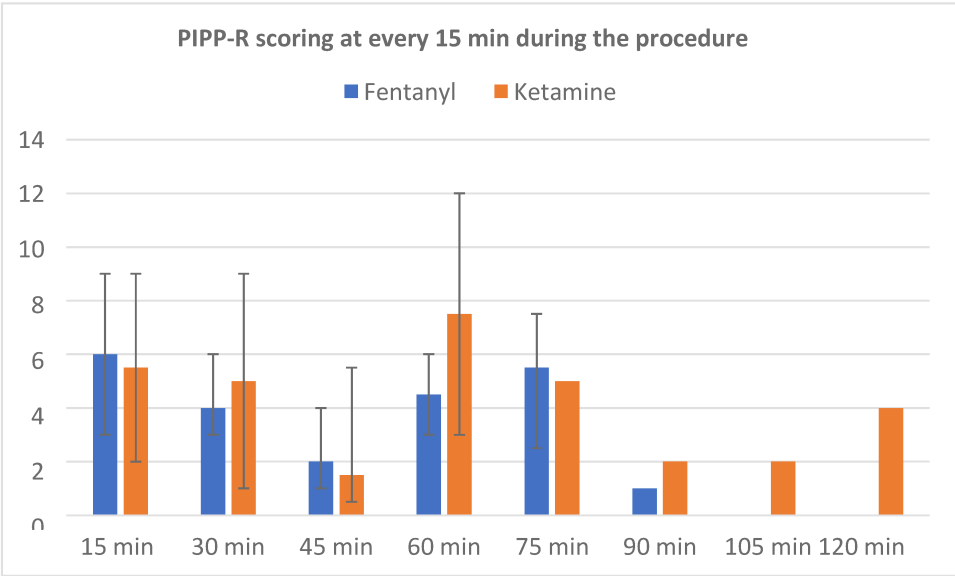

Supplement: bmjopen-2020-046235supp001_data_supplement.pdf [file bmjopen-2020-046235supp001_data_supplement.pdf]
